# Supplementary material
Source: PubMed Central journal article supplement (PMC4787958)
Supplement: salc748202.ww1_default.pdf [file salc748202.ww1_default.pdf]

**Appendix. Characteristics of sample**

| Practice<br>N=27                                                  | Mean (SD) or<br>number (%), as<br>appropriate | Doctor<br>N=150              | Mean (SD) or<br>number (%), as<br>appropriate | Patient<br>N=4573                 | Mean (SD) or<br>number (%), as<br>appropriate |
|-------------------------------------------------------------------|-----------------------------------------------|------------------------------|-----------------------------------------------|-----------------------------------|-----------------------------------------------|
| List size                                                         | 7279 (3041)                                   | Sex: male                    | 87 (58%)                                      | Age                               | 51.6 (19.0)                                   |
| No of full time equivalent<br>GPs                                 | 3.81 (1.71)                                   | Years since<br>qualification | 22.3 (8.7)                                    | Sex: male                         | 1771 (38.7%)                                  |
| Advanced Access practice                                          | 12 (44%)                                      | Qualified in UK              | 128 (85%)                                     | Ethnicity: white                  | 4464 (97.6%)                                  |
| Ex-fundholding practice                                           | 11 (41%)                                      |                              |                                               | Housing status:<br>owner/occupier | 3240 (70.9%)                                  |
| Total points under Quality<br>and Outcomes Framework              | 1011 (963 to<br>1040)*                        |                              |                                               | Employment status:<br>employed    | 2236 (48.9%)                                  |
| Practice operating under<br>Personal Medical Services<br>contract | 9 (33%)                                       |                              |                                               |                                   |                                               |
| Training Practice                                                 | 13 (48%)                                      |                              |                                               |                                   |                                               |
| Receives dispensing<br>payments                                   | 4 (15%)                                       |                              |                                               |                                   |                                               |

\*Median and interquartile range
